# Supplementary material for: Thermo-Sensitive Genic Male Sterile Lines of Neo-Tetraploid Rice Developed through Gene Editing Technology Revealed High Levels of Hybrid Vigor
Source: MDPI journal article supplement (doi:10.3390/plants11111390), 2022-05-24
Supplement: s1 [file s1]

**Additional files**

**Additional file 1. Table S1** Primer sequences used in this study. **Table S2** Pollen fertility and seed setting of self-crossed TGMS lines at different temperatures. **Table S3** The fertility and heading date of H2s and H3s mutants under different sowing dates. **Table S4** Heterosis analysis of F<sub>1</sub> hybrid compared to the paternal

**Table S1** Primer sequences used in this study

| Primer name | Primer sequence (5'-3')                |
|-------------|----------------------------------------|
| U-F         | CTCCGTTTTACCTGTGGAATCG                 |
| gRNA-R      | CGGAGGAAAATTCCATCCAC                   |
| Pps-GGL     | TTCAGAGGTCTCTCTCGCACTGGAATCGGCAGCAAAGG |
| Pgs-GG2     | AGCGTGGGTCTCGTCAGGGTCCATCCACTCCAAGCTC  |
| Pps-GG2     | TTCAGAGGTCTCTCTGACACTGGAATCGGCAGCAAAGG |
| Pgs-GGR     | AGCGTGGGTCTCGACCGGGTCCATCCACTCCAAGCTC  |
| TMS5a-F     | GCCGTGGAGGGCATCTCCATCGG                |
| TMS5a-R     | AAACCCGATGGAGATGCCCTCCA                |
| TMS5b-F     | GGCAAGCTCAAGCCAGAGTATCT                |
| TMS5b-R     | AAACAGATACTCTGGCTTGAGCT                |
| HPT-F       | GTCCGTCAGGACATTGTTGGAG                 |
| HPT-R       | GTCTCCGACCTGATGCAGCTCCGG               |

**Table S2 Pollen fertility and seed setting of self-crossed TGMS lines at different temperatures**

| Average<br>temperature | Photoperi<br>od | H2s              |              | H3s              |             |
|------------------------|-----------------|------------------|--------------|------------------|-------------|
|                        |                 | Pollen fertility | Seed setting | Pollen fertility | Seed        |
|                        |                 | (%)              | (%)          | (%)              | setting (%) |
| 23°C                   | 13.5h           | 45.73±4.53       | 21.04±2.75   | 60.46±5.54       | 32.22±3.89  |
| 26°C                   | 13.5h           | 0                | 0            | 0                | 0           |
| 30°C                   | 13.5h           | 0                | 0            | 0                | 0           |

**Table S3** The fertility and heading date of H2s and H3s mutants under different sowing dates.

| Materials | Sowing date<br>(Y-M-D) | Heading date<br>(Y-M-D) | Pollen abortion Type | Pollen fertility<br>(%) |
|-----------|------------------------|-------------------------|----------------------|-------------------------|
| H2s       | 2019-02-27             | 19-06-11                | typical              | 0                       |
|           | 2019-03-07             | 19-06-17                | typical              | 0                       |
|           | 2019-03-17             | 19-06-24                | typical              | 0                       |
|           | 2019-03-27             | 19-06-27                | typical              | 0                       |
|           | 2019-04-07             | 19-06-30                | typical              | 0                       |
|           | 2019-04-17             | 19-07-10                | typical              | 0                       |
|           | 2019-04-27             | 19-07-19                | typical              | 0                       |
|           | 2019-05-07             | 19-07-28                | typical              | 0                       |
|           | 2019-07-21             | 19-10-08                | typical              | 0                       |
|           | 2019-08-02             | 19-10-18                | typical              | 0                       |
|           |                        | 19-11-08                | typical              | 0                       |
|           | 2019-08-14             | 19-11-13                | typical              | 29.42±11.51             |
|           |                        | 19-11-16                | typical              | 49.64±9.53              |
|           | 2020-08-05             | 20-10-27                | typical              | 0                       |
|           | 2020-08-10             | 20-11-07                | typical              | 15.93±8.13              |
|           |                        | 20-11-11                | typical              | 81.16±7.54              |
| H3s       | 2019-02-24             | 19-06-08                | typical              | 0                       |
|           | 2019-07-20             | 19-10-13                | typical              | 0                       |
|           | 2020-03-01             | 20-06-12                | typical              | 0                       |
|           | 2020-08-05             | 20-11-03                | typical              | 43.77±12.48             |
|           | 2020-08-10             | 20-11-07                | typical              | 72.13±8.62              |
|           |                        | 20-11-11                | typical              | 62.94±6.59              |

**Table S4** Heterosis analysis of F<sub>1</sub> hybrid compared to the paternal

| Hybrid cross | Plant height<br>(%) | Panicle length<br>(%) | Effective<br>panicle<br>number<br>(%) | Total<br>grains<br>(%) | Filled<br>grains<br>(%) | Seed set<br>(%) | Grain length<br>(%) | Grain width<br>(%) | Yield per plant<br>(%) | 1000 grain<br>weight<br>(%) |
|--------------|---------------------|-----------------------|---------------------------------------|------------------------|-------------------------|-----------------|---------------------|--------------------|------------------------|-----------------------------|
| H2s X T437   | 7.11                | 14.60                 | 166.60                                | 364.54                 | 1715.38                 | 305.37          | -3.86               | -8.87              | 1299.29                | -21.54                      |
| H2s X T443   | 4.52                | 42.72                 | 142.86                                | 336.41                 | 807.04                  | 111.69          | 0.56                | 2.56               | 902.32                 | 9.61                        |
| H2s X T442   | 5.51                | 6.90                  | 138.64                                | 148.10                 | 322.45                  | 82.15           | -7.53               | 8.55               | 377.36                 | 16.83                       |
| H2s X T445   | 8.19                | 2.31                  | 26.92                                 | 22.41                  | 80.35                   | 53.86           | -3.48               | 3.76               | 67.48                  | -4.89                       |
| H2s X T473   | 6.68                | 23.71                 | 85.96                                 | 84.02                  | 220.95                  | 65.94           | -5.70               | -1.32              | 294.07                 | 21.63                       |
| H3s X 25-26  | -2.03               | -5.04                 | 18.18                                 | 74.00                  | 166.10                  | 50.80           | -13.54              | -2.82              | 151.74                 | -3.93                       |
| H3s X T423   | 22.09               | 43.92                 | 25.00                                 | 279.47                 | 1522.39                 | 328.97          | -2.28               | 10.05              | 2084.97                | 37.29                       |
| H3s X T437   | 11.52               | 16.30                 | 70.00                                 | 280.11                 | 1210.77                 | 265.15          | -1.16               | -6.45              | 1027.47                | -11.78                      |
| H3s X T449   | 21.30               | 4.64                  | 20.83                                 | 35.93                  | 109.71                  | 48.67           | -4.03               | 9.14               | 128.57                 | 11.79                       |
| H3s X T442   | 4.04                | 6.27                  | 115.91                                | 134.13                 | 265.60                  | 57.26           | -6.93               | 6.64               | 327.23                 | 16.55                       |
| H3s X T445   | 14.12               | 8.52                  | 63.85                                 | 106.62                 | 266.64                  | 83.07           | -8.57               | 6.50               | 249.52                 | -1.02                       |
| H3s X T465   | 21.11               | 3.60                  | 13.64                                 | 90.60                  | 175.02                  | 45.73           | -13.50              | 3.13               | 173.40                 | -0.90                       |
| H3s X T473   | 11.66               | 20.53                 | 42.31                                 | 125.56                 | 272.95                  | 60.31           | -12.86              | 2.97               | 364.50                 | 24.14                       |
| H3s X T485   | 30.46               | 6.16                  | 43.75                                 | 149.04                 | 197.81                  | 19.29           | -15.05              | 1.80               | 180.87                 | -4.37                       |
